# Supplementary material for: Supramolecular interactions mediated conformational modulation of flexible linker leading to the isolation of a metallo-macrocycle in a polyoxometalate matrix: Hirshfeld surfaces and 2D fingerprint plots
Source: Royal Society of Chemistry journal article supplement (doi:10.1039/c4ce01714e), 2014-09-11
Supplement: c4ce01714e1.pdf [file c4ce01714e1.pdf]

## Supplementary Information

# Supramolecular Interactions Mediated Conformational Modulation of Flexible Linker Leading to Isolation of Metallo-Macrocycle in the Polyoxometalate Matrix: Hirshfeld surfaces and 2D finger print plots

Bharat Kumar Tripuramallu, Paulami Manna and Samar K. Das\*

*School of Chemistry, University of Hyderabad, Hyderabad 500 046, India*

### Contents

**Section 1:** Additional diagrams of crystal structure

**Section 2:** Theoretical Calculations

- a. Optimized geometries and energies of cis and trans conformations of 1,4-bpimb linker
- b. Hirshfeld surfaces mapped with shape index (left) and curvedness (right) for the title compound

**Section 3:**

- a. Thermogravimetric curve
- b. PXRD patterns
- c. IR spectrum

**Section 4:**

**Table 1** List of bond lengths in the octamolybdate anion and Cu(II) coordination sphere

**Table 2** Complete list of bond lengths and bond angles

## Section 1

### Additional diagrams of crystal structure

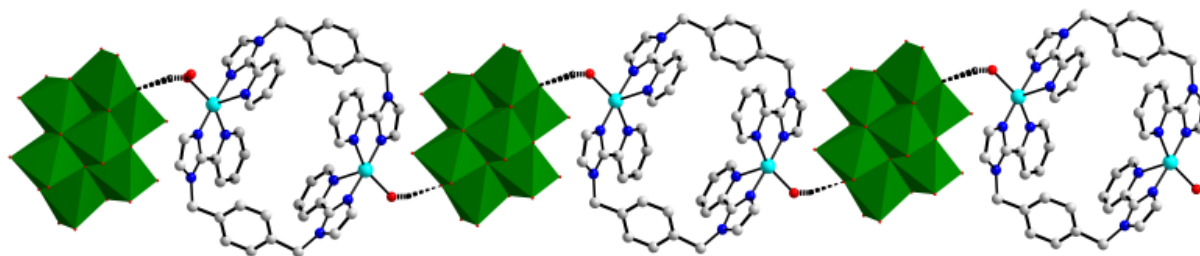

**Fig. S1. 1D chain formed due to O-H...O interactions forming a 1D chain.**

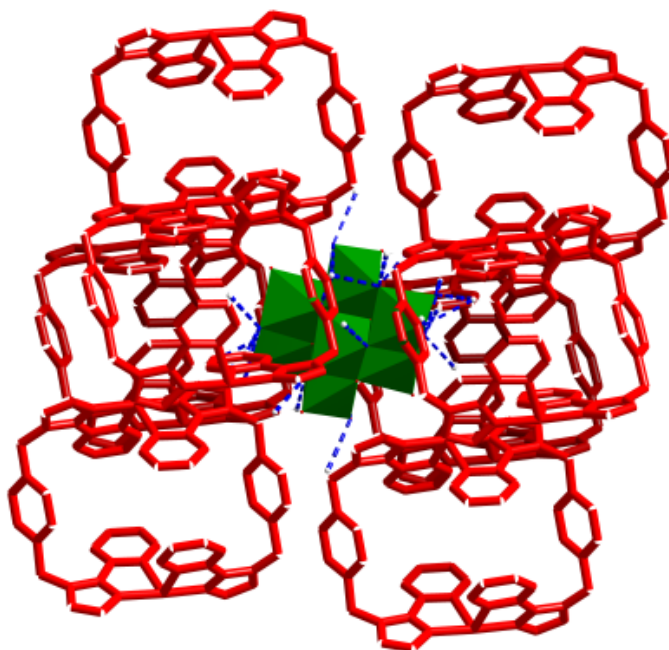

**Fig. S2. Supramolecular interactions around the anion.**

## Section 2

### Theoretical Calculations

#### a. Optimized geometries and energies of cis and trans conformations of 1,4-bpimb linker

```
cis2.log (-/krishna/barat/barupaper/cisfinal) - VIM
skd@skd: ~
cis2.log (-/krishna/barat/barupaper/cisfinal)
1640.66 1668.52 1687.54 1689.98 1692.63
1724.16 1735.53 1737.30 1746.59 1765.86
1830.04 1840.03 1844.83 1866.70 1870.01
1874.29 1884.19 1897.32 1903.63 1933.29
1988.09 1995.64 2010.90 2029.39 2061.37
2067.87 2085.34 2089.40 2107.66 2118.22
2129.24 2145.81 2159.76 2172.01 2176.87
2223.94 2232.68 2235.24 2306.04 2315.51
2323.40 2339.35 2344.13 2379.77 4375.84
4399.57 4445.55 4511.86 4526.98 4528.80
4531.26 4553.61 4562.82 4567.16 4571.93
4588.83 4592.55 4597.60 4598.36 4629.85
4654.75 4656.92 4693.84 4696.78

Zero-point correction= 0.397187 (Hartree/Particle)
Thermal correction to Energy= 0.420990
Thermal correction to Enthalpy= 0.421935
Thermal correction to Gibbs Free Energy= 0.336960
Sum of electronic and Zero-point Energies= -1255.017264
Sum of electronic and thermal Energies= -1254.993461
Sum of electronic and thermal Enthalpies= -1254.992516
Sum of electronic and thermal Free Energies= -1255.077491

E (Thermal) CV S
KCal/Mol Cal/Mol-Kelvin Cal/Mol-Kelvin
Total 264.175 93.120 178.044
Electronic 0.000 0.000 0.000
Translational 0.889 2.981 43.791
Rotational 0.889 2.981 30.831
Vibrational 262.398 87.158 98.221
Vibration 1 0.593 1.987 8.767
Vibration 2 0.593 1.987 7.775
Vibration 3 0.593 1.986 7.229
Vibration 4 0.593 1.985 6.298
Vibration 5 0.594 1.983 5.539
Vibration 6 0.594 1.982 5.487
Vibration 7 0.595 1.980 5.068
Vibration 8 0.598 1.970 4.251
```

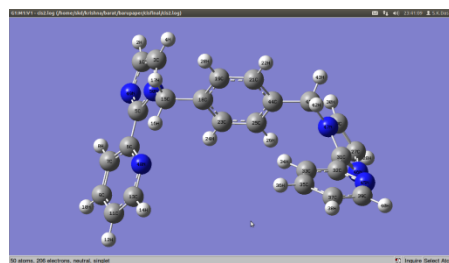

```
trans.log (-/krishna/barat/barupaper/transfinal) - VIM
skd@skd: ~
trans.log (-/krishna/barat/barupaper/transfinal)
1638.75 1687.48 1687.49 1692.31 1692.67
1732.25 1736.53 1741.46 1751.99 1769.23
1832.92 1834.14 1866.26 1867.68 1870.51
1876.03 1883.16 1888.91 1918.80 1930.25
1988.42 1998.38 2027.79 2030.21 2060.02
2061.81 2088.46 2105.84 2105.89 2118.80
2120.32 2146.57 2146.96 2177.30 2177.88
2224.25 2232.02 2232.44 2305.45 2305.54
2323.89 2343.98 2344.00 2380.19 4396.70
4396.71 4498.36 4499.09 4530.34 4530.35
4539.60 4541.82 4565.67 4565.68 4579.80
4582.18 4596.05 4596.67 4630.82 4630.83
4656.05 4656.06 4697.69 4697.70

Zero-point correction= 0.397540 (Hartree/Particle)
Thermal correction to Energy= 0.421327
Thermal correction to Enthalpy= 0.422271
Thermal correction to Gibbs Free Energy= 0.335464
Sum of electronic and Zero-point Energies= -1255.029234
Sum of electronic and thermal Energies= -1255.005447
Sum of electronic and thermal Enthalpies= -1255.004503
Sum of electronic and thermal Free Energies= -1255.091310

E (Thermal) CV S
KCal/Mol Cal/Mol-Kelvin Cal/Mol-Kelvin
Total 264.387 92.988 182.700
Electronic 0.000 0.000 0.000
Translational 0.889 2.981 43.791
Rotational 0.889 2.981 36.895
Vibrational 262.609 87.027 102.013
Vibration 1 0.592 1.987 10.402
Vibration 2 0.593 1.987 8.374
Vibration 3 0.593 1.986 7.345
Vibration 4 0.593 1.986 6.853
Vibration 5 0.593 1.985 6.487
Vibration 6 0.593 1.985 6.003
Vibration 7 0.595 1.979 4.937
Vibration 8 0.597 1.971 4.328
```

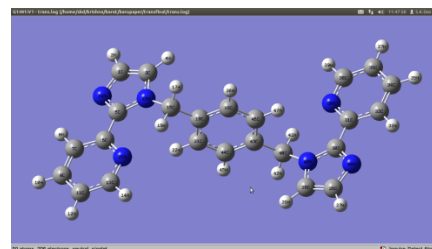

**b. Hirshfeld surfaces mapped with shape index (left) and curvedness (right) for the title compound**

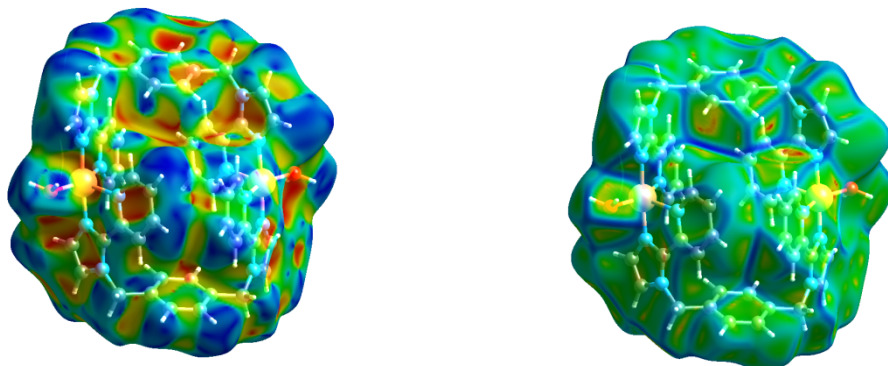

### **Section 3**

**a. Thermogravimetric curve of  $[\text{Cu}(\text{1,4-bpimb})(\text{H}_2\text{O})_2][\text{Mo}_8\text{O}_{26}] \cdot 4\text{H}_2\text{O}$**

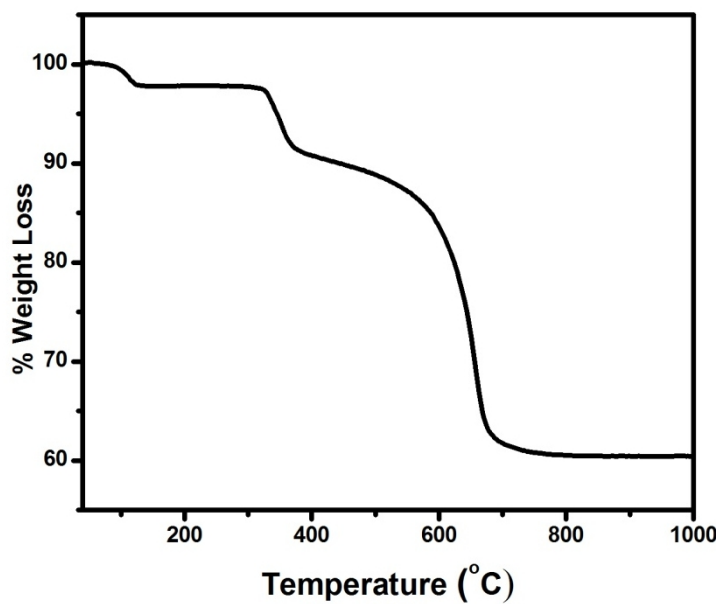

**b. PXRD of  $[\text{Cu}(1,4\text{-bpimb})(\text{H}_2\text{O})_2][\text{Mo}_8\text{O}_{26}] \cdot 4\text{H}_2\text{O}$**

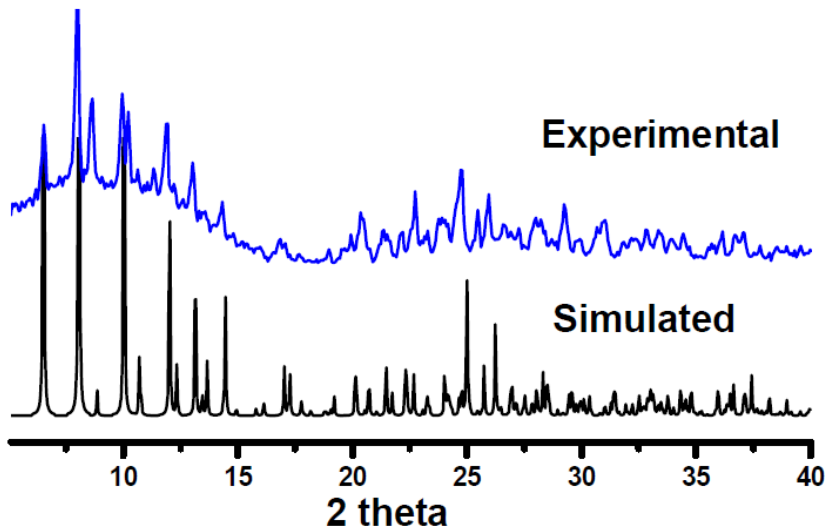

**c. IR spectrum of  $[\text{Cu}(1,4\text{-bpimb})(\text{H}_2\text{O})_2][\text{Mo}_8\text{O}_{26}] \cdot 4\text{H}_2\text{O}$**

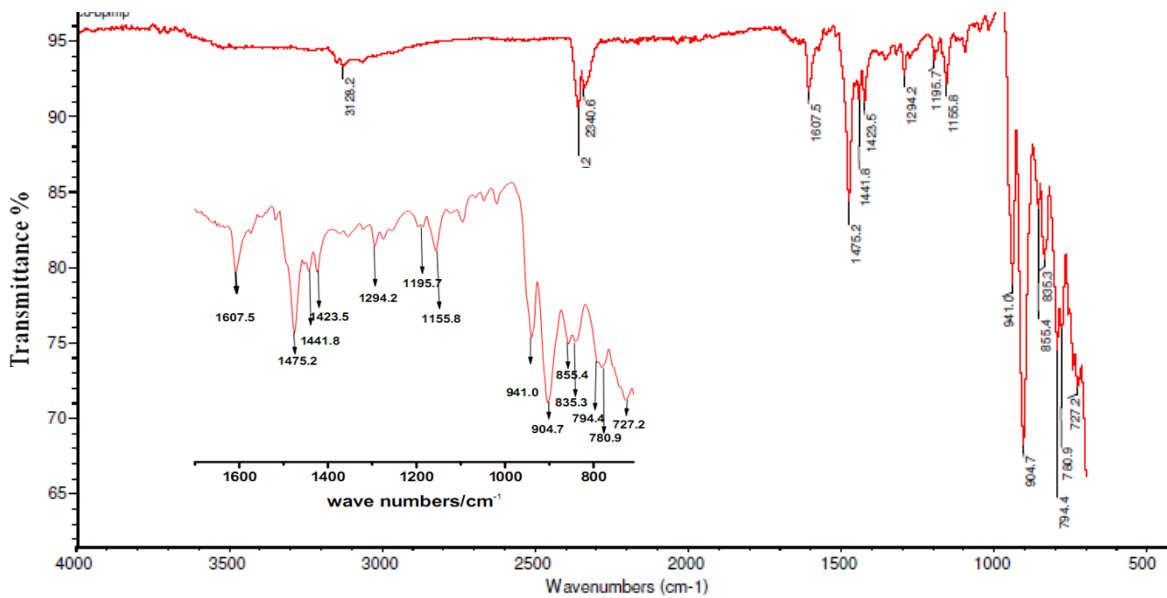

## Section 4

**Table 1.** List of bond lengths in the octamolybdate anion and Cu(II) coordination sphere

| Mo-O <sub>t</sub>    | Mo-O(μ <sub>2</sub> )             | Mo-O(μ <sub>3</sub> )              | Mo-O(μ <sub>4</sub> )              | Cu-N/ Cu-O           |
|----------------------|-----------------------------------|------------------------------------|------------------------------------|----------------------|
| Mo(1)-O(1) 1.685(6)  | Mo(1)-O(2) 1.740(6)               | Mo(1)-O(3) 1.946(5)                | Mo(1)-O(13) 2.131(5)               | Cu(5)-N(1) 2.051(7)  |
| Mo(2)-O(5) 1.698(6)  | Mo(2)-O(6) 1.901(5)               | Mo(1)-O(12) 1.946(6)               | Mo(1)-O(13) <sup>#1</sup> 2.377(5) | Cu(5)-N(2) 1.932(7)  |
| Mo(2)-O(4) 1.711(6)  | Mo(3)-O(9) 1.920(5)               | Mo(2)-O(3) 1.973(6)                | Mo(2)-O(13) 2.318(5)               | Cu(5)-N(4) 2.197(7)  |
| Mo(3)-O(10) 1.697(6) | Mo(4)-O(6) 1.898(5)               | Mo(2)-O(12) <sup>#1</sup> 2.348(6) | Mo(3)-O(13) 2.299(5)               | Cu(5)-N(5) 1.963(8)  |
| Mo(3)-O(11) 1.699(6) | Mo(4)-O(9) 1.925(6)               | Mo(3)-O(12) 1.972(6)               | Mo(4)-O(13) 2.493(5)               | Cu(5)-O(16) 2.037(7) |
| Mo(4)-O(8) 1.687(6)  | O(2)-Mo(4) <sup>#1</sup> 2.274(6) | Mo(3)-O(3) <sup>#1</sup> 2.357(6)  |                                    |                      |
| Mo(4)-O(7) 1.701(6)  |                                   |                                    |                                    |                      |
| #1 -x+1, -y+2, -z    |                                   |                                    |                                    |                      |

**Table 2**

### Complete list of bond lengths and bond angles

|                           |           |                           |           |
|---------------------------|-----------|---------------------------|-----------|
| C(1)-C(2)                 | 1.328(13) | C(20)-C(21)               | 1.354(13) |
| C(1)-N(5)                 | 1.356(11) | C(21)-C(22)               | 1.387(13) |
| C(2)-N(6)                 | 1.377(12) | C(22)-N(1)                | 1.319(11) |
| C(3)-N(5)                 | 1.313(11) | C(23)-N(3)                | 1.456(11) |
| C(3)-N(6)                 | 1.338(10) | C(23)-C(24)               | 1.489(12) |
| C(3)-C(4)                 | 1.498(12) | C(24)-C(14) <sup>#1</sup> | 1.374(12) |
| C(4)-N(4)                 | 1.340(11) | C(24)-C(12) <sup>#1</sup> | 1.403(12) |
| C(4)-C(5)                 | 1.377(12) | Cu(5)-N(2)                | 1.932(7)  |
| C(5)-C(6)                 | 1.401(12) | Cu(5)-N(5)                | 1.963(8)  |
| C(6)-C(7)                 | 1.378(12) | Cu(5)-O(16)               | 2.037(7)  |
| C(7)-C(8)                 | 1.391(12) | Cu(5)-N(1)                | 2.051(7)  |
| C(8)-N(4)                 | 1.319(11) | Cu(5)-N(4)                | 2.197(7)  |
| C(9)-N(6)                 | 1.463(11) | Mo(1)-O(1)                | 1.685(6)  |
| C(9)-C(10)                | 1.512(13) | Mo(1)-O(2)                | 1.740(6)  |
| C(10)-C(11)               | 1.368(12) | Mo(1)-O(3)                | 1.946(5)  |
| C(10)-C(13)               | 1.402(12) | Mo(1)-O(12)               | 1.946(6)  |
| C(11)-C(12)               | 1.379(12) | Mo(1)-O(13)               | 2.131(5)  |
| C(12)-C(24) <sup>#1</sup> | 1.403(12) | Mo(1)-O(13) <sup>#2</sup> | 2.377(5)  |
| C(13)-C(14)               | 1.390(12) | Mo(2)-O(5)                | 1.698(6)  |
| C(14)-C(24) <sup>#1</sup> | 1.374(12) | Mo(2)-O(4)                | 1.711(6)  |
| C(15)-C(16)               | 1.345(12) | Mo(2)-O(6)                | 1.901(5)  |
| C(15)-N(2)                | 1.365(10) | Mo(2)-O(3)                | 1.973(6)  |
| C(16)-N(3)                | 1.365(10) | Mo(2)-O(13)               | 2.318(5)  |
| C(17)-N(2)                | 1.321(11) | Mo(2)-O(12) <sup>#2</sup> | 2.348(6)  |
| C(17)-N(3)                | 1.357(11) | Mo(3)-O(10)               | 1.697(6)  |
| C(17)-C(18)               | 1.462(12) | Mo(3)-O(11)               | 1.699(6)  |
| C(18)-N(1)                | 1.367(11) | Mo(3)-O(9)                | 1.920(5)  |
| C(18)-C(19)               | 1.375(12) | Mo(3)-O(12)               | 1.972(6)  |
| C(19)-C(20)               | 1.376(12) |                           |           |

|                     |          |                       |           |
|---------------------|----------|-----------------------|-----------|
| Mo(3)-O(13)         | 2.299(5) | N(3)-C(23)-C(24)      | 113.6(7)  |
| Mo(3)-O(3)#2        | 2.357(6) | C(14)#1-C(24)-C(12)#1 | 118.2(8)  |
| Mo(4)-O(8)          | 1.687(6) | C(14)#1-C(24)-C(23)   | 123.5(8)  |
| Mo(4)-O(7)          | 1.701(6) | C(12)#1-C(24)-C(23)   | 118.3(8)  |
| Mo(4)-O(6)          | 1.898(5) | N(2)-Cu(5)-N(5)       | 177.3(3)  |
| Mo(4)-O(9)          | 1.925(6) | N(2)-Cu(5)-O(16)      | 93.4(3)   |
| Mo(4)-O(2)#2        | 2.274(6) | N(5)-Cu(5)-O(16)      | 88.6(3)   |
| Mo(4)-O(13)         | 2.493(5) | N(2)-Cu(5)-N(1)       | 81.2(3)   |
| O(2)-Mo(4)#2        | 2.274(6) | N(5)-Cu(5)-N(1)       | 97.7(3)   |
| O(3)-Mo(3)#2        | 2.357(6) | O(16)-Cu(5)-N(1)      | 155.4(3)  |
| O(12)-Mo(2)#2       | 2.348(6) | N(2)-Cu(5)-N(4)       | 99.9(3)   |
| O(13)-Mo(1)#2       | 2.377(5) | N(5)-Cu(5)-N(4)       | 78.1(3)   |
|                     |          | O(16)-Cu(5)-N(4)      | 94.0(3)   |
| C(2)-C(1)-N(5)      | 110.2(8) | N(1)-Cu(5)-N(4)       | 110.6(3)  |
| C(1)-C(2)-N(6)      | 106.4(8) | O(1)-Mo(1)-O(2)       | 104.3(3)  |
| N(5)-C(3)-N(6)      | 111.0(7) | O(1)-Mo(1)-O(3)       | 101.8(3)  |
| N(5)-C(3)-C(4)      | 119.2(8) | O(2)-Mo(1)-O(3)       | 96.3(2)   |
| N(6)-C(3)-C(4)      | 129.8(7) | O(1)-Mo(1)-O(12)      | 101.2(3)  |
| N(4)-C(4)-C(5)      | 123.2(8) | O(2)-Mo(1)-O(12)      | 97.1(2)   |
| N(4)-C(4)-C(3)      | 111.3(7) | O(3)-Mo(1)-O(12)      | 149.5(2)  |
| C(5)-C(4)-C(3)      | 125.4(8) | O(1)-Mo(1)-O(13)      | 99.3(2)   |
| C(4)-C(5)-C(6)      | 117.8(8) | O(2)-Mo(1)-O(13)      | 156.4(2)  |
| C(7)-C(6)-C(5)      | 119.1(8) | O(3)-Mo(1)-O(13)      | 78.7(2)   |
| C(6)-C(7)-C(8)      | 118.6(8) | O(12)-Mo(1)-O(13)     | 78.1(2)   |
| N(4)-C(8)-C(7)      | 122.8(9) | O(1)-Mo(1)-O(13)#2    | 174.8(2)  |
| N(6)-C(9)-C(10)     | 113.1(7) | O(2)-Mo(1)-O(13)#2    | 80.9(2)   |
| C(11)-C(10)-C(13)   | 119.3(9) | O(3)-Mo(1)-O(13)#2    | 77.8(2)   |
| C(11)-C(10)-C(9)    | 118.0(8) | O(12)-Mo(1)-O(13)#2   | 77.4(2)   |
| C(13)-C(10)-C(9)    | 122.7(8) | O(13)-Mo(1)-O(13)#2   | 75.5(2)   |
| C(10)-C(11)-C(12)   | 121.5(8) | O(5)-Mo(2)-O(4)       | 105.1(3)  |
| C(11)-C(12)-C(24)#1 | 120.1(8) | O(5)-Mo(2)-O(6)       | 100.4(3)  |
| C(14)-C(13)-C(10)   | 119.0(8) | O(4)-Mo(2)-O(6)       | 101.7(3)  |
| C(24)#1-C(14)-C(13) | 121.9(8) | O(5)-Mo(2)-O(3)       | 100.3(3)  |
| C(16)-C(15)-N(2)    | 108.8(8) | O(4)-Mo(2)-O(3)       | 98.3(3)   |
| C(15)-C(16)-N(3)    | 107.4(7) | O(6)-Mo(2)-O(3)       | 146.2(2)  |
| N(2)-C(17)-N(3)     | 110.0(8) | O(5)-Mo(2)-O(13)      | 160.0(2)  |
| N(2)-C(17)-C(18)    | 118.7(8) | O(4)-Mo(2)-O(13)      | 94.8(2)   |
| N(3)-C(17)-C(18)    | 131.2(8) | O(6)-Mo(2)-O(13)      | 77.7(2)   |
| N(1)-C(18)-C(19)    | 121.3(8) | O(3)-Mo(2)-O(13)      | 73.7(2)   |
| N(1)-C(18)-C(17)    | 111.2(8) | O(5)-Mo(2)-O(12)#2    | 88.5(2)   |
| C(19)-C(18)-C(17)   | 127.5(8) | O(4)-Mo(2)-O(12)#2    | 164.5(2)  |
| C(18)-C(19)-C(20)   | 118.4(9) | O(6)-Mo(2)-O(12)#2    | 82.7(2)   |
| C(21)-C(20)-C(19)   | 120.1(9) | O(3)-Mo(2)-O(12)#2    | 71.5(2)   |
| C(20)-C(21)-C(22)   | 119.3(8) | O(13)-Mo(2)-O(12)#2   | 71.44(19) |
| N(1)-C(22)-C(21)    | 121.6(9) | O(10)-Mo(3)-O(11)     | 104.2(3)  |
| O(10)-Mo(3)-O(9)    | 101.8(3) | O(9)-Mo(3)-O(3)#2     | 84.1(2)   |
| O(11)-Mo(3)-O(9)    | 99.9(3)  | O(12)-Mo(3)-O(3)#2    | 71.3(2)   |
| O(10)-Mo(3)-O(12)   | 97.1(3)  | O(13)-Mo(3)-O(3)#2    | 71.96(19) |
| O(11)-Mo(3)-O(12)   | 101.8(3) | O(8)-Mo(4)-O(7)       | 104.3(3)  |
| O(9)-Mo(3)-O(12)    | 146.6(2) | O(8)-Mo(4)-O(6)       | 104.4(3)  |
| O(10)-Mo(3)-O(13)   | 94.9(2)  | O(7)-Mo(4)-O(6)       | 98.0(3)   |
| O(11)-Mo(3)-O(13)   | 160.9(2) | O(8)-Mo(4)-O(9)       | 102.3(3)  |
| O(9)-Mo(3)-O(13)    | 77.5(2)  | O(7)-Mo(4)-O(9)       | 98.8(3)   |
| O(12)-Mo(3)-O(13)   | 73.6(2)  | O(6)-Mo(4)-O(9)       | 143.7(2)  |
| O(10)-Mo(3)-O(3)#2  | 164.3(2) | O(8)-Mo(4)-O(2)#2     | 89.4(2)   |
| O(11)-Mo(3)-O(3)#2  | 88.9(2)  | O(7)-Mo(4)-O(2)#2     | 166.3(2)  |

|                    |           |                     |           |
|--------------------|-----------|---------------------|-----------|
| O(6)-Mo(4)-O(2)#2  | 78.5(2)   | Mo(1)-O(3)-Mo(3)#2  | 109.7(3)  |
| O(9)-Mo(4)-O(2)#2  | 77.7(2)   | Mo(2)-O(3)-Mo(3)#2  | 104.2(2)  |
| O(8)-Mo(4)-O(13)   | 158.6(2)  | Mo(4)-O(6)-Mo(2)    | 118.1(3)  |
| O(7)-Mo(4)-O(13)   | 97.0(2)   | Mo(3)-O(9)-Mo(4)    | 118.3(3)  |
| O(6)-Mo(4)-O(13)   | 73.4(2)   | Mo(1)-O(12)-Mo(3)   | 108.9(3)  |
| O(9)-Mo(4)-O(13)   | 72.7(2)   | Mo(1)-O(12)-Mo(2)#2 | 110.6(2)  |
| O(2)#2-Mo(4)-O(13) | 69.29(18) | Mo(3)-O(12)-Mo(2)#2 | 104.5(2)  |
| C(22)-N(1)-C(18)   | 119.2(8)  | Mo(1)-O(13)-Mo(3)   | 92.0(2)   |
| C(22)-N(1)-Cu(5)   | 127.1(6)  | Mo(1)-O(13)-Mo(2)   | 91.55(19) |
| C(18)-N(1)-Cu(5)   | 113.5(5)  | Mo(3)-O(13)-Mo(2)   | 162.6(3)  |
| C(17)-N(2)-C(15)   | 107.0(7)  | Mo(1)-O(13)-Mo(1)#2 | 104.5(2)  |
| C(17)-N(2)-Cu(5)   | 115.2(6)  | Mo(3)-O(13)-Mo(1)#2 | 97.83(19) |
| C(15)-N(2)-Cu(5)   | 137.8(6)  | Mo(2)-O(13)-Mo(1)#2 | 97.8(2)   |
| C(17)-N(3)-C(16)   | 106.8(7)  | Mo(1)-O(13)-Mo(4)   | 164.7(3)  |
| C(17)-N(3)-C(23)   | 128.2(8)  | Mo(3)-O(13)-Mo(4)   | 86.95(17) |
| C(16)-N(3)-C(23)   | 124.9(8)  | Mo(2)-O(13)-Mo(4)   | 85.18(17) |
| Mo(1)-O(2)-Mo(4)#2 | 118.9(3)  | Mo(1)#2-O(13)-Mo(4) | 90.78(17) |
| Mo(1)-O(3)-Mo(2)   | 109.0(3)  |                     |           |

\*\*\*\*\*End\*\*\*\*\*
